# Supplementary material
Source: PubMed Central journal article supplement (PMC7683375)
Supplement: NIHMS1614246-supplement-Supp_tableS1.pdf [file NIHMS1614246-supplement-Supp_tableS1.pdf]

Supplementary Table 1

Region of Interest

area in pixels

Fi Fimbria  
 Fx Fornix  
 CC Corpus Calosum  
 EC External capsule  
 IC Internal capsule  
 HD dorsal hippocampus  
 HV ventral hippocampus

| 3xTg-AD       |              | NC          |              | 3xTg-AD |               | NC  |              | 3xTg-AD |               | NC  |              | 3xTg-AD |               | NC  |              | 3xTg-AD |               | NC  |             |     |               |     |               |  |               |  |               |
|---------------|--------------|-------------|--------------|---------|---------------|-----|--------------|---------|---------------|-----|--------------|---------|---------------|-----|--------------|---------|---------------|-----|-------------|-----|---------------|-----|---------------|--|---------------|--|---------------|
| ROI           | Area         | ROI         | Area         | ROI     | Area          | ROI | Area         | ROI     | Area          | ROI | Area         | ROI     | Area          | ROI | Area         | ROI     | Area          | ROI | Area        |     |               |     |               |  |               |  |               |
| Fi            | 41           | Fi          | 42           | Fx      | 17            | Fx  | 17           | CC      | 57            | CC  | 57           | EC      | 79            | EC  | 99           | IC      | 36            | IC  | 36          | ROI | Area          | ROI | Area          |  |               |  |               |
| Fx            | 37           | Fi          | 43           | Fx      | 17            | Fx  | 17           | CC      | 57            | CC  | 57           | EC      | 86            | EC  | 90           | IC      | 38            | IC  | 38          | HD  | 121           | ROI | Area          |  |               |  |               |
| CC            | 41           | Fi          | 50           | Fx      | 17            | Fx  | 17           | CC      | 57            | CC  | 57           | EC      | 75            | EC  | 77           | IC      | 35            | IC  | 37          | HD  | 135           | HD  | 162           |  |               |  |               |
| EC            | 36           | Fi          | 43           | Fx      | 15            | Fx  | 17           | CC      | 56            | CC  | 57           | EC      | 74            | EC  | 94           | IC      | 33            | IC  | 35          | HD  | 128           | HD  | 168           |  |               |  |               |
| IC            | 40           | Fi          | 38           | Fx      | 17            | Fx  | 17           | CC      | 56            | CC  | 56           | EC      | 78            | EC  | 77           | IC      | 34            | IC  | 37          | HD  | 158           | HD  | 179           |  |               |  |               |
| HD            | 43           | Fi          | 42           | Fx      | 17            | Fx  | 17           | CC      | 57            | CC  | 57           | EC      | 68            | EC  | 90           | IC      | 37            | IC  | 37          | HD  | 156           | HD  | 195           |  |               |  |               |
| HV            | 53           | Fi          | 49           | Fx      | 17            | Fx  | 17           | CC      | 57            | CC  | 57           | EC      | 75            | EC  | 82           | IC      | 37            | IC  | 36          | HD  | 174           | HD  | 206           |  |               |  |               |
|               | 49           | Fi          | 40           | Fx      | 17            | Fx  | 17           | CC      | 57            | CC  | 57           | EC      | 77            | EC  | 70           | IC      | 44            | IC  | 41          | HD  | 213           | HD  | 217           |  |               |  |               |
|               | 40           | Fi          | 41           | Fx      | 17            | Fx  | 17           | CC      | 57            | CC  | 57           | EC      | 74            | EC  | 105          | IC      | 40            | IC  | 39          | HD  | 194           | HD  | 166           |  |               |  |               |
|               | 38           | Fi          | 47           | Fx      | 17            | Fx  | 17           | CC      | 56            | CC  | 57           | EC      | 79            | EC  | 95           | IC      | 40            | IC  | 44          | HD  | 179           | HD  | 130           |  |               |  |               |
|               | 52           | Fi          | 42           | Fx      | 17            | Fx  | 17           | CC      | 57            | CC  | 57           | EC      | 85            | EC  | 90           | IC      | 39            | IC  | 39          | HD  | 151           | HD  | 160           |  |               |  |               |
|               | 49           | Fi          | 39           | Fx      | 17            | Fx  | 17           | CC      | 57            | CC  | 57           | EC      | 82            | EC  | 90           | IC      | 40            | IC  | 39          | HD  | 176           | HD  | 153           |  |               |  |               |
|               | 55           | Fi          | 51           | Fx      | 16            | Fx  | 17           | CC      | 57            | CC  | 57           | EC      | 90            | EC  | 97           | IC      | 46            | IC  | 36          | HD  | 176           | HD  | 194           |  |               |  |               |
|               | 62           | Fi          | 47           | Fx      | 17            | Fx  | 17           | CC      | 57            | CC  | 57           | EC      | 91            | EC  | 87           | IC      | 35            | IC  | 39          | HD  | 188           | HD  | 183           |  |               |  |               |
|               | 41           | Fi          | 39           | Fx      | 17            | Fx  | 17           | CC      | 57            | CC  | 57           | EC      | 88            | EC  | 83           | IC      | 37            | IC  | 46          | HD  | 150           | HD  | 150           |  |               |  |               |
|               | 44           | Fi          | 46           | Fx      | 17            | Fx  | 17           | CC      | 57            | CC  | 57           | EC      | 84            | EC  | 83           | IC      | 41            | IC  | 43          | HD  | 174           | HD  | 168           |  |               |  |               |
|               | 35           | Fi          | 30           | Fx      | 17            | Fx  | 17           | CC      | 55            | CC  | 53           | EC      | 85            | EC  | 74           | IC      | 35            | IC  | 37          | HD  | 147           | HD  | 168           |  |               |  |               |
|               | 41           | Fi          | 42           | Fx      | 17            | Fx  | 17           | CC      | 57            | CC  | 57           | EC      | 84            | EC  | 78           | IC      | 41            | IC  | 36          | HD  | 136           | HD  | 168           |  |               |  |               |
|               | 33           | Fi          | 54           | Fx      | 17            | Fx  | 17           | CC      | 56            | CC  | 57           | EC      | 96            | EC  | 82           | IC      | 39            | IC  | 34          | HD  | 132           | HD  | 139           |  |               |  |               |
|               | 38           | Fi          | 49           | Fx      | 17            | Fx  | 17           | CC      | 57            | CC  | 57           | EC      | 98            | EC  | 86           | IC      | 40            | IC  | 35          | HD  | 172           | HD  | 261           |  |               |  |               |
|               | 48           | Fi          | 46           | Fx      | 17            | Fx  | 17           | CC      | 57            | CC  | 57           | EC      | 80            | EC  | 80           | IC      | 36            | IC  | 38          | HD  | 128           | HD  | 205           |  |               |  |               |
|               | 43           | Fi          | 42           | Fx      | 17            | Fx  | 17           | CC      | 57            | CC  | 57           | EC      | 97            | EC  | 74           | IC      | 39            | IC  | 34          | HD  | 139           | HD  | 212           |  |               |  |               |
|               | 41           | Fi          | 47           | Fx      | 17            | Fx  | 17           | CC      | 57            | CC  | 57           | EC      | 82            | EC  | 74           | IC      | 35            | IC  | 34          | HD  | 145           | HD  | 233           |  |               |  |               |
|               | 46           | Fi          | 54           | Fx      | 17            | Fx  | 17           | CC      | 57            | CC  | 57           | EC      | 94            | EC  | 74           | IC      | 33            | IC  | 37          | HD  | 191           | HD  | 184           |  |               |  |               |
|               | 40           | Fi          | 42           | Fx      | 17            | Fx  | 17           | CC      | 57            | CC  | 57           | EC      | 95            | EC  | 65           | IC      | 40            | IC  | 38          | HD  | 201           | HD  | 152           |  |               |  |               |
|               | 44           | Fi          | 48           | Fx      | 17            | Fx  | 17           | CC      | 57            | CC  | 57           | EC      | 96            | EC  | 72           | IC      | 37            | IC  | 35          | HD  | 175           | HD  | 217           |  |               |  |               |
|               | 50           | Fi          | 56           | Fx      | 14            | Fx  | 17           | CC      | 56            | CC  | 57           | EC      | 94            | EC  | 66           | IC      | 40            | IC  | 34          | HD  | 157           | HD  | 191           |  |               |  |               |
|               | 49           | Fi          | 44           | Fx      | 17            | Fx  | 17           | CC      | 57            | CC  | 57           | EC      | 94            | EC  | 74           | IC      | 44            | IC  | 37          | HD  | 148           | HD  | 230           |  |               |  |               |
|               | 48           | Fi          | 43           | Fx      | 17            | Fx  | 17           | CC      | 57            | CC  | 57           | EC      | 96            | EC  | 69           | IC      | 44            | IC  | 34          | HD  | 148           | HD  | 166           |  |               |  |               |
|               | 35           | Fi          | 45           | Fx      | 17            | Fx  | 17           | CC      | 57            | CC  | 57           | EC      | 64            | EC  | 66           | IC      | 37            | IC  | 38          | HD  | 129           | HD  | 194           |  |               |  |               |
|               | 35           | Fi          | 39           | Fx      | 17            | Fx  | 17           | CC      | 57            | CC  | 56           | EC      | 63            | EC  | 90           | IC      | 36            | IC  | 40          | HD  | 129           | HD  | 160           |  |               |  |               |
|               | 44           | Fi          | 42           | Fx      | 17            | Fx  | 14           | CC      | 57            | CC  | 57           | EC      | 65            | EC  | 82           | IC      | 36            | IC  | 43          | HD  | 154           | HD  | 223           |  |               |  |               |
|               | 46           | Fi          | 43           | Fx      | 17            | Fx  | 17           | CC      | 57            | CC  | 56           | EC      | 66            | EC  | 89           | IC      | 41            | IC  | 44          | HD  | 160           | HD  | 202           |  |               |  |               |
|               | 47           | Fi          | 46           | Fx      | 17            | Fx  | 17           | CC      | 57            | CC  | 57           | EC      | 72            | EC  | 95           | IC      | 38            | IC  | 43          | HD  | 175           | HD  | 207           |  |               |  |               |
|               | 49           | Fi          | 38           | Fx      | 17            | Fx  | 17           | CC      | 57            | CC  | 55           | EC      | 60            | EC  | 87           | IC      | 37            | IC  | 46          | HD  | 186           | HD  | 244           |  |               |  |               |
|               | 44           | Fi          | 41           | Fx      | 17            | Fx  | 17           | CC      | 57            | CC  | 57           | EC      | 64            | EC  | 86           | IC      | 34            | IC  | 45          | HD  | 178           | HD  | 237           |  |               |  |               |
|               | 40           | Fi          | 43           | Fx      | 17            | Fx  | 17           | CC      | 57            | CC  | 57           | EC      | 60            | EC  | 83           | IC      | 37            | IC  | 41          | HD  | 164           | HD  | 262           |  |               |  |               |
|               | 44           | Fi          | 36           | Fx      | 17            | Fx  | 17           | CC      | 57            | CC  | 57           | EC      | 65            | EC  | 99           | IC      | 35            | IC  | 45          | HD  | 154           | HD  | 239           |  |               |  |               |
|               | 43           | Fi          | 43           | Fx      | 17            | Fx  | 17           | CC      | 57            | CC  | 57           | EC      | 71            | EC  | 86           | IC      | 40            | IC  | 40          | HD  | 182           | HD  | 171           |  |               |  |               |
|               | 49           | Fi          | 38           | Fx      | 17            | Fx  | 17           | CC      | 57            | CC  | 57           | EC      | 61            | EC  | 81           | IC      | 32            | IC  | 42          | HD  | 180           | HD  | 204           |  |               |  |               |
|               | 42           | Fi          | 41           | Fx      | 17            | Fx  | 17           | CC      | 57            | CC  | 57           | EC      | 65            | EC  | 84           | IC      | 37            | IC  | 42          | HD  | 131           | HD  | 184           |  |               |  |               |
|               | 41           | Fi          |              | Fx      | 17            | Fx  | 17           | CC      | 56            | CC  | 57           | EC      | 69            | EC  | 81           | IC      | 36            | IC  | 43          | HD  | 154           | HD  | 183           |  |               |  |               |
|               | 34           | Fi          |              | Fx      | 17            | Fx  | 17           | CC      | 57            | CC  | 57           | EC      | 78            | EC  |              | IC      | 36            | IC  |             | HD  | 150           | HD  | 183           |  |               |  |               |
|               | 40           | Fi          |              | Fx      | 17            | Fx  | 17           | CC      | 53            | CC  | 57           | EC      | 77            | EC  |              | IC      | 36            | IC  |             | HD  | 173           | HD  | 173           |  |               |  |               |
|               | 40           | Fi          |              | Fx      | 17            | Fx  | 17           | CC      | 54            | CC  | 57           | EC      | 76            | EC  |              | IC      | 36            | IC  |             | HD  | 187           | HD  | 173           |  |               |  |               |
|               | 40           | Fi          |              | Fx      | 17            | Fx  | 17           | CC      | 56            | CC  | 57           | EC      | 68            | EC  |              | IC      | 36            | IC  |             | HD  | 187           | HD  | 172           |  |               |  |               |
|               | 50           | Fi          |              | Fx      | 17            | Fx  | 17           | CC      | 57            | CC  | 57           | EC      | 81            | EC  |              | IC      | 36            | IC  |             | HD  | 175           | HD  | 175           |  |               |  |               |
|               | 52           | Fi          |              | Fx      | 17            | Fx  | 17           | CC      | 56            | CC  | 57           | EC      | 84            | EC  |              | IC      | 34            | IC  |             | HD  | 175           | HD  | 190           |  |               |  |               |
|               | 50           | Fi          |              | Fx      | 17            | Fx  | 17           | CC      | 57            | CC  | 57           | EC      | 80            | EC  |              | IC      | 35            | IC  |             | HD  | 190           | HD  | 175           |  |               |  |               |
|               | 43           | Fi          |              | Fx      | 17            | Fx  | 17           | CC      | 57            | CC  | 57           | EC      | 81            | EC  |              | IC      | 33            | IC  |             | HD  | 175           | HD  | 222           |  |               |  |               |
|               | 34           | Fi          |              | Fx      | 17            | Fx  | 17           | CC      | 55            | CC  | 57           | EC      | 77            | EC  |              | IC      | 37            | IC  |             | HD  | 149           | HD  | 177           |  |               |  |               |
|               | 43           | Fi          |              | Fx      | 17            | Fx  | 17           | CC      | 57            | CC  | 57           | EC      | 77            | EC  |              | IC      | 41            | IC  |             | HD  | 149           | HD  | 177           |  |               |  |               |
|               | 44           | Fi          |              | Fx      | 17            | Fx  | 17           | CC      | 57            | CC  | 57           | EC      | 75            | EC  |              | IC      | 38            | IC  |             | HD  | 177           | HD  | 177           |  |               |  |               |
|               | 39           | Fi          |              | Fx      | 17            | Fx  | 17           | CC      | 57            | CC  | 57           | EC      | 91            | EC  |              | IC      | 41            | IC  |             | HD  | 190           | HD  | 177           |  |               |  |               |
|               | 43           | Fi          |              | Fx      | 17            | Fx  | 17           | CC      | 57            | CC  | 57           | EC      | 76            | EC  |              | IC      | 43            | IC  |             | HD  | 190           | HD  | 174           |  |               |  |               |
|               | 43           | Fi          |              | Fx      | 17            | Fx  | 17           | CC      | 57            | CC  | 57           | EC      | 97            | EC  |              | IC      | 41            | IC  |             | HD  | 209           | HD  | 174           |  |               |  |               |
|               | 43           | Fi          |              | Fx      | 17            | Fx  | 17           | CC      | 57            | CC  | 57           | EC      | 87            | EC  |              | IC      | 40            | IC  |             | HD  | 210           | HD  | 174           |  |               |  |               |
|               | 42           | Fi          |              | Fx      | 17            | Fx  | 17           | CC      | 57            | CC  | 57           | EC      | 90            | EC  |              | IC      | 36            | IC  |             | HD  | 196           | HD  | 174           |  |               |  |               |
|               | 45           | Fi          |              | Fx      | 17            | Fx  | 17           | CC      | 57            | CC  | 57           | EC      | 97            | EC  |              | IC      | 40            | IC  |             | HD  | 196           | HD  | 174           |  |               |  |               |
|               | 43           | Fi          |              | Fx      | 17            | Fx  | 17           | CC      | 57            | CC  | 57           | EC      | 98            | EC  |              | IC      | 43            | IC  |             | HD  | 188           | HD  | 171           |  |               |  |               |
|               |              |             |              |         |               |     |              |         |               |     |              |         |               |     |              |         |               |     |             |     |               |     |               |  |               |  |               |
| <b>Mean</b>   | <b>43.58</b> |             | <b>43.68</b> |         | <b>16.9</b>   |     | <b>16.93</b> |         | <b>56.68</b>  |     | <b>56.78</b> |         | <b>80.24</b>  |     | <b>82.85</b> |         | <b>37.93</b>  |     | <b>38.9</b> |     | <b>166.5</b>  |     | <b>193.1</b>  |  | <b>254.7</b>  |  | <b>276.9</b>  |
| <b>t-test</b> |              | <b>0.92</b> |              |         | <b>t-test</b> |     | <b>0.77</b>  |         | <b>t-test</b> |     | <b>0.50</b>  |         | <b>t-test</b> |     | <b>0.22</b>  |         | <b>t-test</b> |     | <b>0.17</b> |     | <b>t-test</b> |     | <b>0.0001</b> |  | <b>t-test</b> |  | <b>0.0038</b> |
