# Supplementary material
Source: PubMed Central journal article supplement (PMC7683375)
Supplement: NIHMS1614246-supplement-Supp_tableS2.pdf [file NIHMS1614246-supplement-Supp_tableS2.pdf]

**Supplementary Table 2****Myelin Basic Protein (MBP)  
Immunoreactivity  
Fimbria (Fi)**

|  | <b>3xTg-AD</b> | <b>NC</b>     |               |
|--|----------------|---------------|---------------|
|  | 32.772         | 27.173        |               |
|  | 27.750         | 28.828        |               |
|  | 45.042         | 36.005        |               |
|  | 30.069         | 38.042        |               |
|  | 29.528         | 36.318        |               |
|  | 41.456         | 42.224        |               |
|  | 37.151         | 43.596        |               |
|  | 26.887         | 53.831        |               |
|  | 28.662         | 42.228        |               |
|  | 27.717         | 47.912        |               |
|  | 28.008         | 58.654        |               |
|  | 37.594         | 59.216        |               |
|  | 36.083         | 41.139        |               |
|  | 47.850         | 44.774        |               |
|  | 43.499         | 38.364        |               |
|  | 35.462         | 41.915        |               |
|  | 35.462         | 41.970        |               |
|  | 46.290         | 43.706        |               |
|  | 43.615         | 39.627        |               |
|  | 37.191         | 42.352        |               |
|  | 31.172         |               |               |
|  | 55.296         |               |               |
|  | 45.837         |               |               |
|  | 36.837         |               |               |
|  | 38.080         |               |               |
|  | 34.146         |               |               |
|  | 29.222         |               |               |
|  | 30.351         |               |               |
|  | 34.718         |               |               |
|  | 43.267         |               |               |
|  | 37.305         |               |               |
|  | 32.580         |               |               |
|  | 50.526         |               |               |
|  | <b>Mean</b>    | <b>36.892</b> | <b>42.394</b> |
|  | <b>SD</b>      | <b>7.362</b>  | <b>8.130</b>  |
|  | <b>T-Test</b>  |               | <b>0.0143</b> |
